# Supplementary material for: Development of a high-spatial-resolution annual emission inventory of greenhouse gases from open straw burning in Northeast China from 2001 to 2020
Source: Copernicus journal article supplement (doi:10.5194/acp-24-13101-2024), 2024-11-27
Supplement: Supplementary file 1 [file acp-24-13101-2024-supplement.pdf]

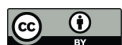

*Supplement of*

## **Development of a high-spatial-resolution annual emission inventory of greenhouse gases from open straw burning in Northeast China from 2001 to 2020**

**Zihan Song et al.**

*Correspondence to:* Song Cui (cuisong-bq@neau.edu.cn)

The copyright of individual parts of the supplement might differ from the article licence.

10 **Table S1.** The geographic scope and temporal coverage of the data involved in this study

| Data                                            | Data Sources                                                                                                                               | Geographic scope                                               | Temporal coverage |
|-------------------------------------------------|--------------------------------------------------------------------------------------------------------------------------------------------|----------------------------------------------------------------|-------------------|
| MODIS fire product<br>(MCD14ML)                 | University of Maryland<br>( <a href="http://ftp://fuoco.geog.umd.edu">sftp://fuoco.geog.umd.edu</a> )                                      | Northeast China                                                | 2001-2020         |
| ChinaCropArea1km                                | <a href="http://www.nesdc.org.cn/">http://www.nesdc.org.cn/</a>                                                                            | Northeast China                                                | 2001-2019         |
| ChinaCropPhen1km                                | <a href="http://www.nesdc.org.cn/">http://www.nesdc.org.cn/</a>                                                                            | Northeast China                                                | 2001-2019         |
| HLJ-Soybean-map                                 | <a href="https://figshare.com/articles/figure/HLJ_Soybean_map/14776500">https://figshare.com/articles/figure/HLJ_Soybean_map/14776500</a>  | Heilongjiang Province                                          | 2001-2012         |
| Crop classification maps for<br>Northeast China | <a href="https://doi.org/10.6084/m9.figshare.20411424.v1">https:// doi.org/10.6084/m9.figshare.20411424.v1</a>                             | Northeast China                                                | 2013-2020         |
| Output of major farm products                   | National Bureau of Statistics of China (NBSC)<br>( <a href="http://www.stats.gov.cn/tjsj/ndsj/">http://www.stats.gov.cn/tjsj/ndsj/</a> )   | Heilongjiang Province,<br>Jilin Province,<br>Liaoning Province | 2001-2020         |
| Rural residential coal consumption              | National Bureau of Statistics of China (NBSC)<br>( <a href="http://www.stats.gov.cn/tjsj/tjcbw/">http://www.stats.gov.cn/tjsj/tjcbw/</a> ) | Heilongjiang Province,<br>Jilin Province,<br>Liaoning Province | 2001-2020         |

11 Note: Missing data for a certain year were replaced with those of the adjacent year, e.g. the distribution and phenology of corn, rice, and wheat in 2020 are supplemented  
 12 with relevant data from 2019. In addition, since the bean lacked the corresponding phenology data, the mode of emergence and maturity dates of other crops were used  
 13 to supplement. The above data processing process will produce errors, which we would like to clarify here.

14

15 **Table S2.** Pearson correlation coefficient of CO<sub>2</sub>-eq emissions and straw yield

| Study area      | 2003-2020 | Period I (2003-2012) | Period II (2013-2017) | Period III (2018-2020) |
|-----------------|-----------|----------------------|-----------------------|------------------------|
| Northeast China | 0.673**   | 0.734**              | -                     | -                      |
| Heilongjiang    | 0.614**   | 0.705**              | -                     | -                      |
| Jilin           | 0.737**   | -                    | -                     | -                      |
| Liaoning        | -         | -                    | -                     | -                      |

16 Note: \*\* significance level at  $p < 0.01$ ; \* significance level at  $p < 0.05$

17 **Table S3.** Pearson correlation coefficient of CO<sub>2</sub>-eq emissions and rural residential coal consumption

| Study area      | 2003-2020 | Period I (2003-2012) | Period II (2013-2017) | Period III (2018-2020) |
|-----------------|-----------|----------------------|-----------------------|------------------------|
| Northeast China | 0.719**   | -                    | -                     | -                      |
| Heilongjiang    | 0.608**   | 0.648**              | -                     | -                      |
| Jilin           | 0.673**   | -                    | -                     | -                      |
| Liaoning        | -         | -                    | -                     | -                      |

18 Note: \*\* significance level at  $p < 0.01$ ; \* significance level at  $p < 0.05$

19

20

21

22 **Table S4.** The straw burning bans in Heilongjiang, Jinlin, and Liaoning

| Province     | Number | Year | Straw burning bans                                                                                                                     |
|--------------|--------|------|----------------------------------------------------------------------------------------------------------------------------------------|
| Heilongjiang | 1      | 2015 | Emergency Notice on Further Promoting Straw Burning Banning                                                                            |
|              | 2      | 2016 | Implementation Plan for Heilongjiang Province to Prohibit Burning Straw in the Field to Improve the Quality of Atmospheric Environment |
|              | 3      |      | Notice on Further Strengthening the Province's Straw Burning Banning Control Work                                                      |
|              | 4      | 2018 | Three-year Action Plan for Comprehensive Utilization of Straw in Harbin City, Suihua City, Zhaozhou County and Zhaoyuan County         |
|              | 5      |      | Implementation Plan for Heilongjiang Province to Comprehensive Utilisation of Straw in 2019                                            |
|              | 6      | 2020 | Implementation Plan for Heilongjiang Province to Comprehensive Utilisation of Straw in 2020                                            |
| Jilin        | 1      | 2013 | Notice on Prohibiting Open Burning of Crop Straw                                                                                       |
|              | 2      | 2014 | Notice on Further Promoting the Banning of Straw Burning in Autumn and Winter                                                          |
|              | 3      | 2016 | Instructions on Promoting the Comprehensive Utilization of Crop Straws                                                                 |
|              | 4      | 2017 | Decision on the Prohibition of Open Burning and Comprehensive Utilization of Crop Straw                                                |
|              | 5      | 2018 | Work Plan for Banning Straw Burning in Autumn and Winter in Jilin Province 2018                                                        |
|              | 6      | 2019 | Notice on Enhancing Straw Programme Burning and Removal Work                                                                           |
|              | 7      | 2020 | 2020 Autumn and Winter Key Areas Straw Burning Control Package Assistance Program                                                      |
| Liaoning     | 1      | 2016 | Implementation Opinions on Promoting Comprehensive Utilization of Crop Straw and Banning Burning Work (2016-2018)                      |
|              | 2      |      | Liaoning Province 2017-2018 Autumn and Winter Comprehensive Air Pollution Control and Tackling Action Supervision Programme            |
|              | 3      | 2018 | Liaoning Province Straw Burning Prevention and Control Responsibility Measures                                                         |
|              | 4      | 2020 | Straw Burning Control Work Programme for Liaoning Province during 2020-2021                                                            |

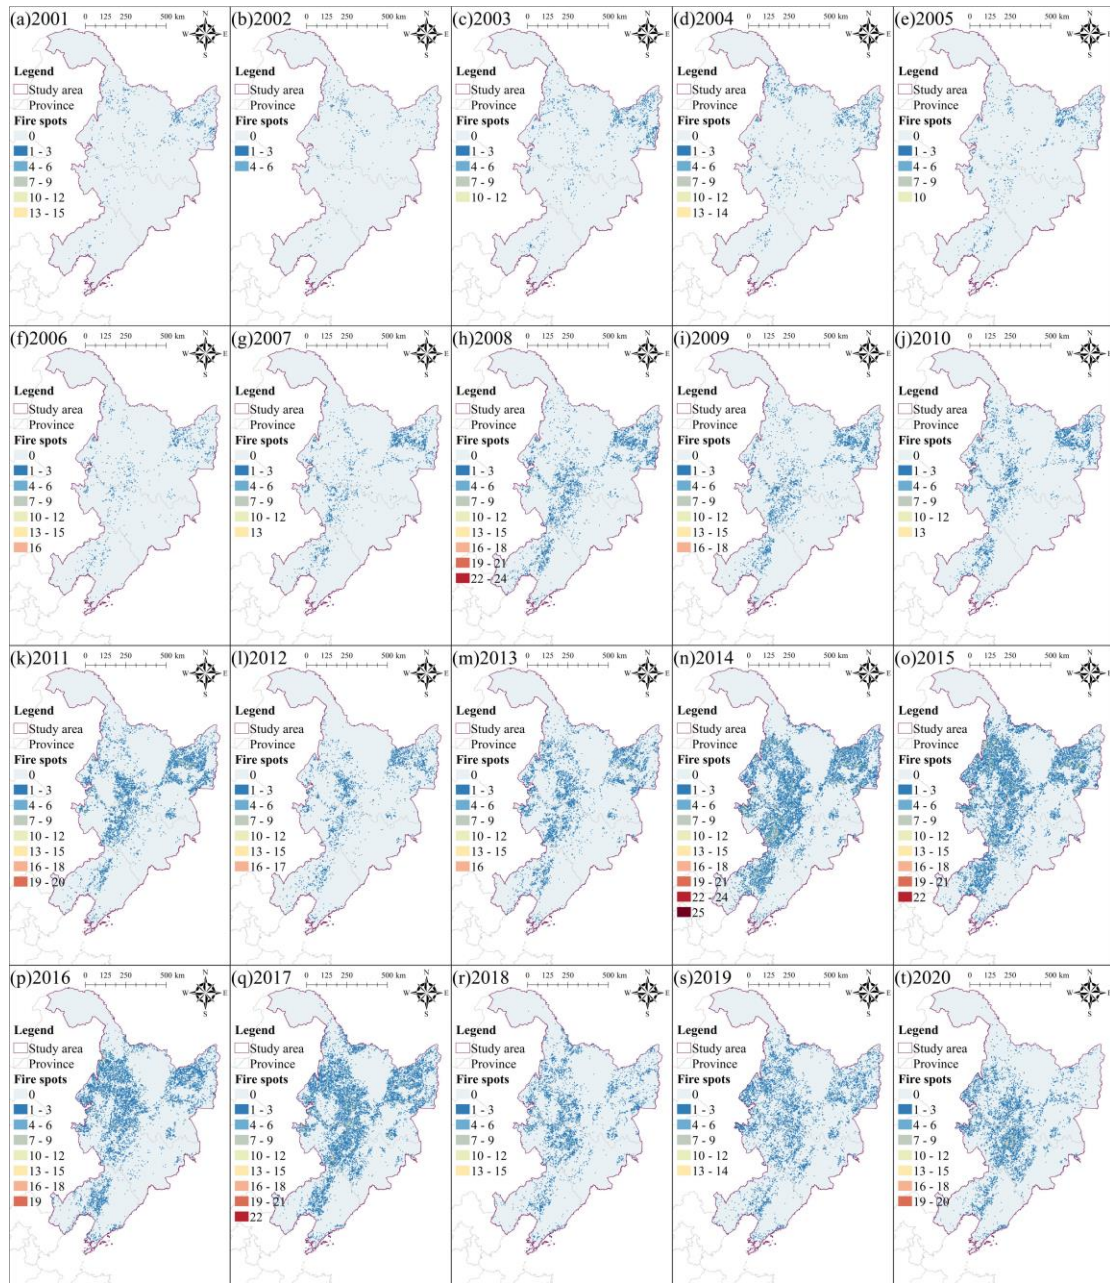

24

25 **Fig. S1** The spatial distribution of annual fire spots from open straw burning in Northeast China

26 from 2001 to 2020

27

28

29

30

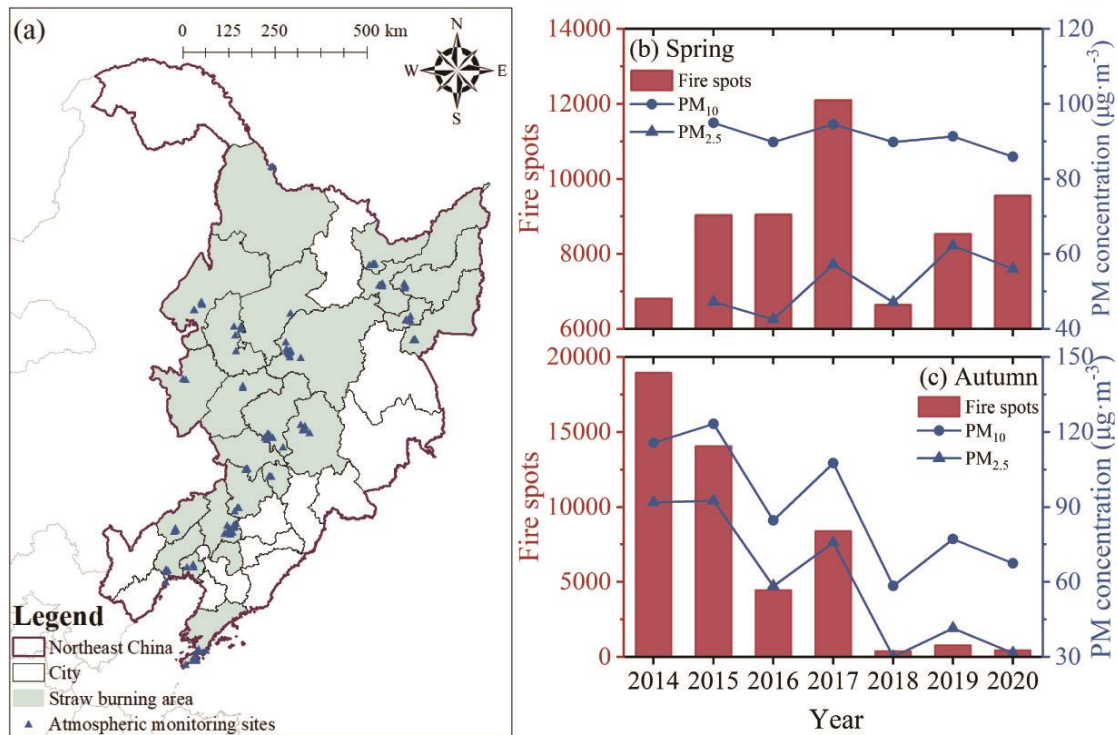

31  
 32 **Fig. S2** (a) Spatial distribution of atmospheric monitoring sites in straw burning areas in Northeast  
 33 China; (b) and (c) represent the variations of fire spots and particulate matter (PM<sub>10</sub> and PM<sub>2.5</sub>)  
 34 concentrations (<http://www.cnemc.cn>) during the period of open straw burning in spring and autumn,  
 35 respectively, in Northeast China from 2014 to 2020. Note: The range of y-axis is different for each  
 36 season. The red y-axis indicates fire spots, with values ranging from 6000 to 14000 for spring, and  
 37 0 to 20000 for autumn; the blue y-axis indicates PM concentrations, with values ranging from 40 to  
 38 120 μg·m<sup>-3</sup> for spring, and 30 to 150 μg·m<sup>-3</sup> for autumn.

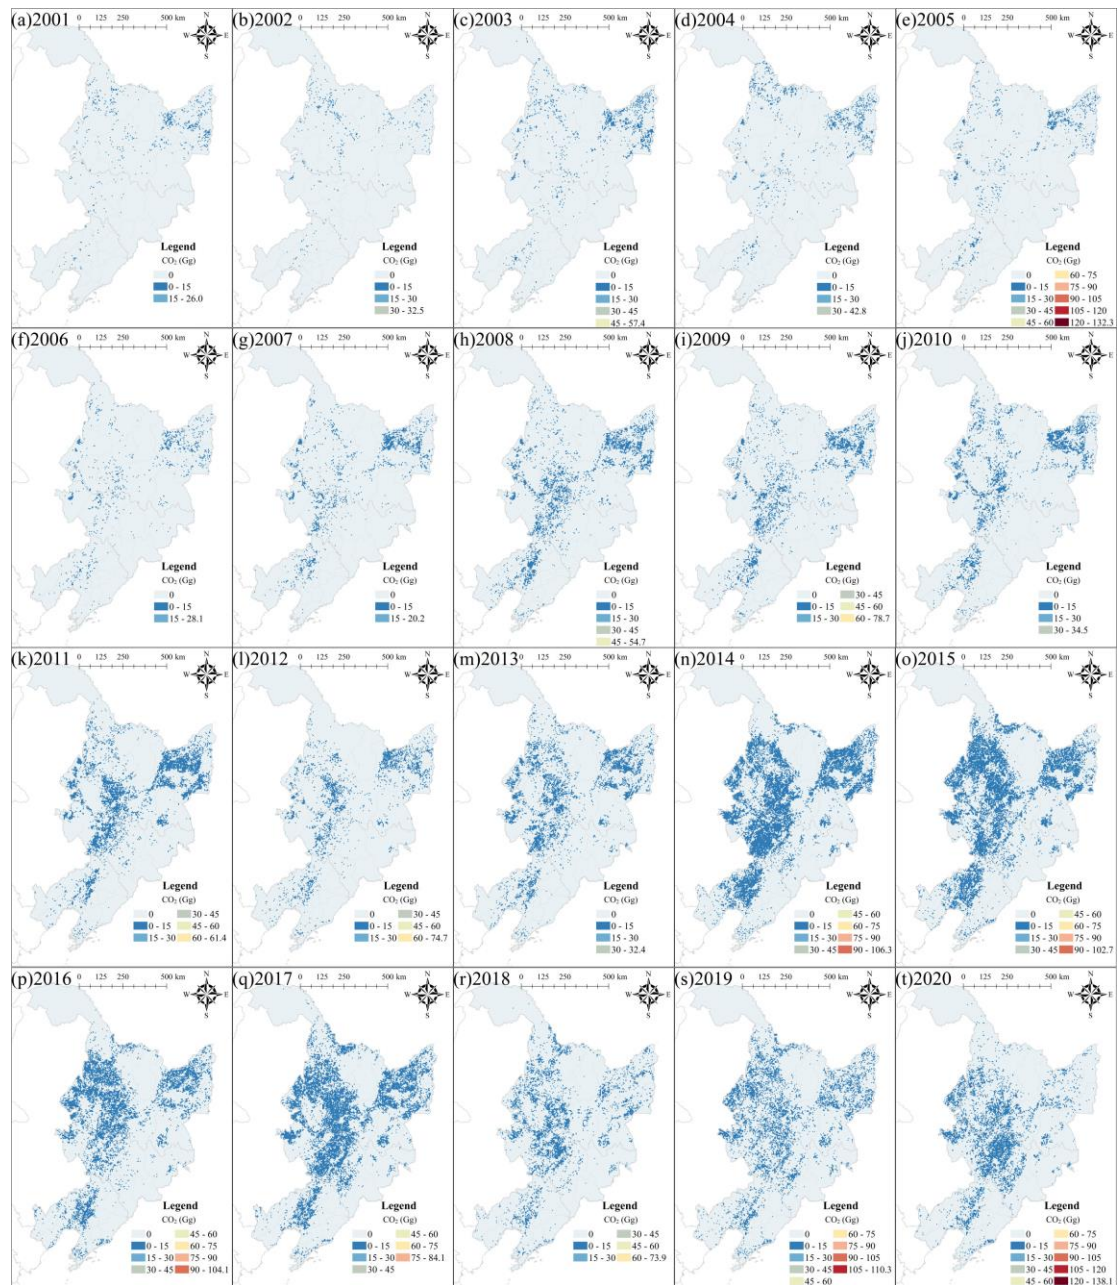

39

40 **Fig. S3** The annual CO<sub>2</sub> emission inventory from open straw burning in Northeast China from 2001

41 to 2020

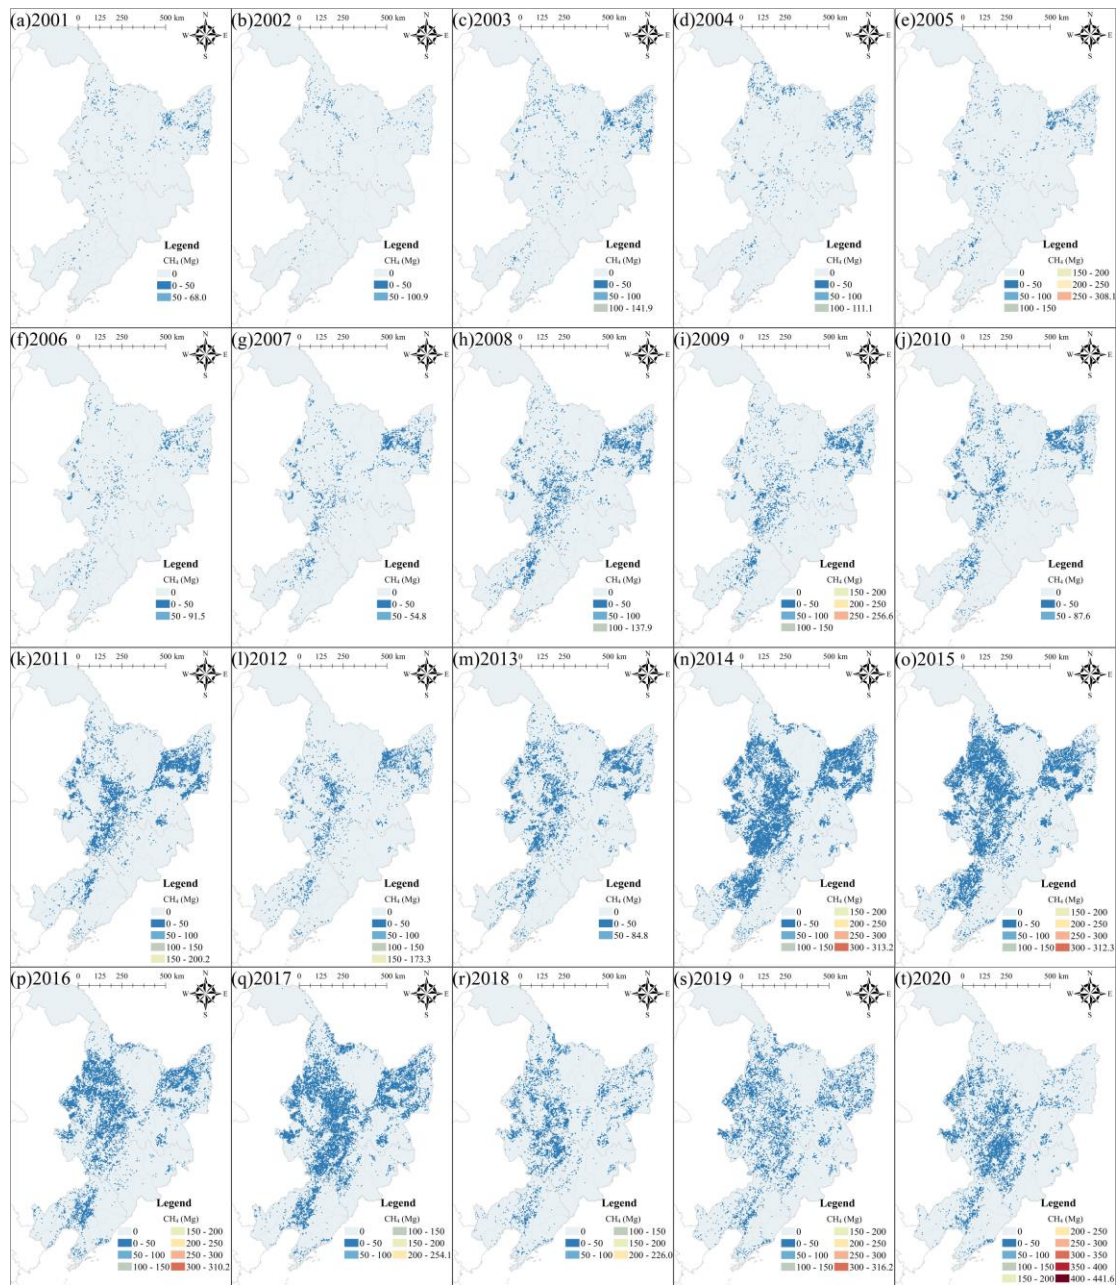

42

43 **Fig. S4** The annual CH<sub>4</sub> emission inventory from open straw burning in Northeast China from 2001

44 to 2020



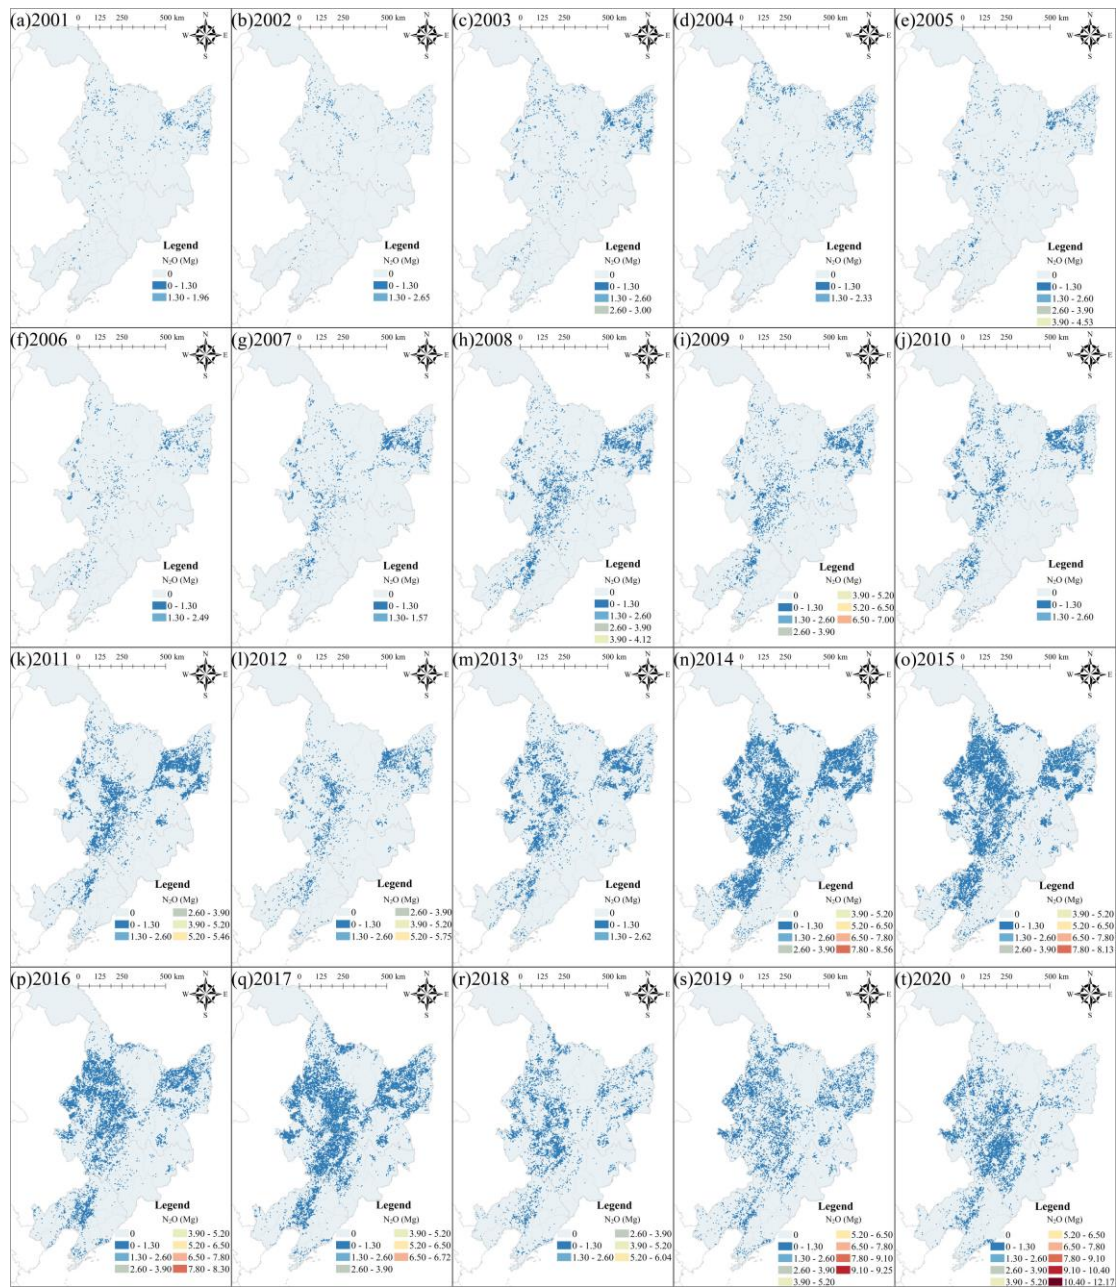

45

46 **Fig. S5** The annual N<sub>2</sub>O emission inventory from open straw burning in Northeast China from 2001

47 to 2020

48

49

50

51

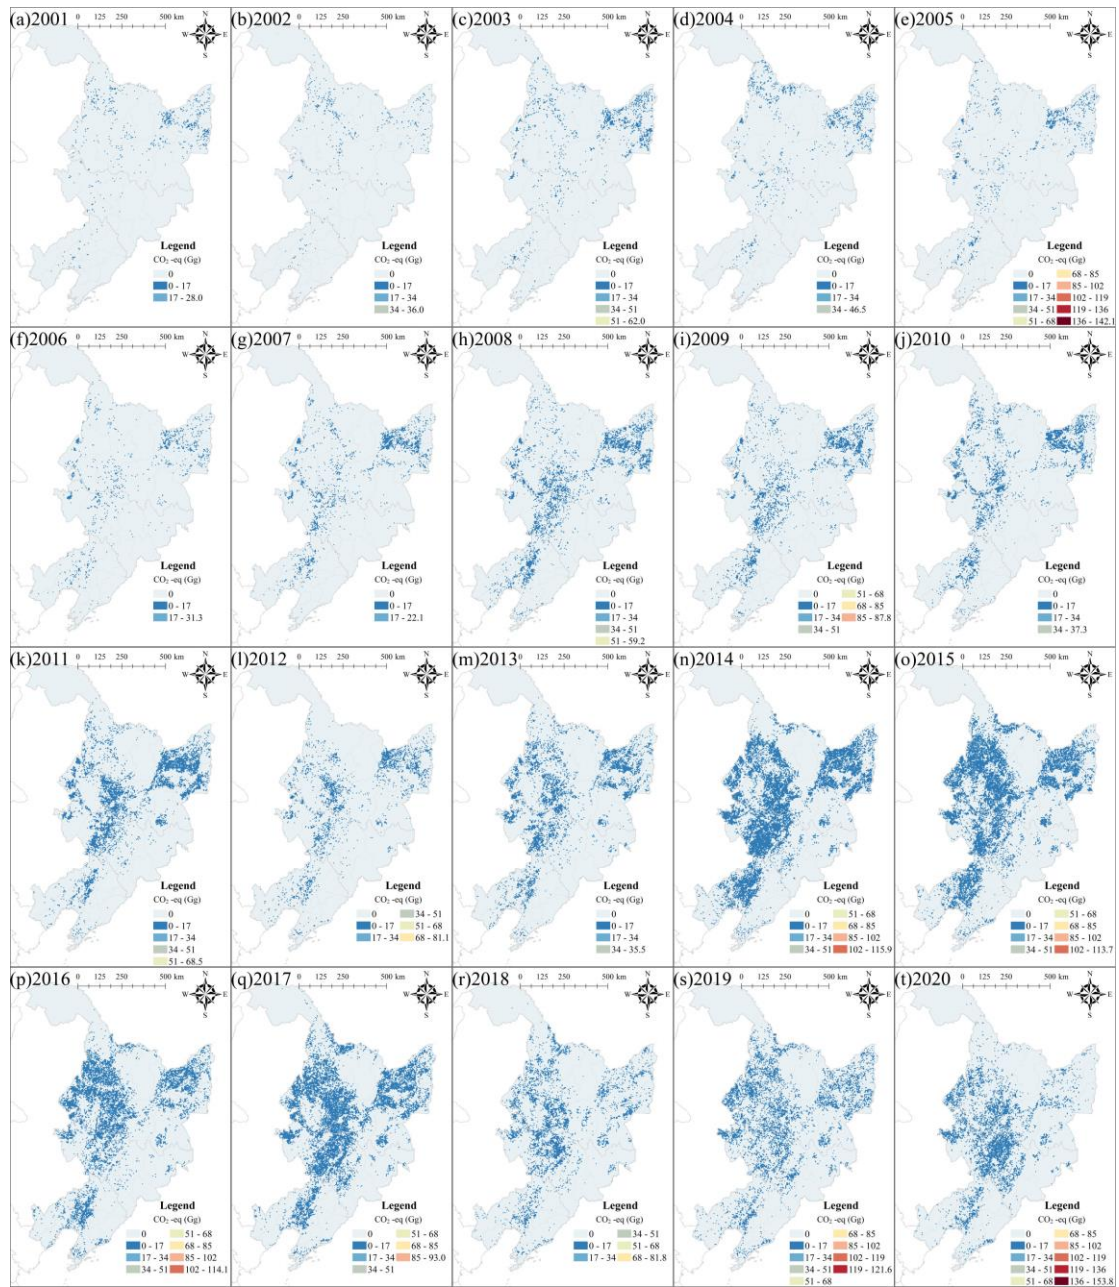

52

53 **Fig. S6** The annual CO<sub>2</sub>-eq emission inventory from open straw burning in Northeast China from

54 2001 to 2020.
